# Supplementary material for: Cadmium nitrate and DNA methylation in gastropods: comparison between ovotestis and hepatopancreas
Source: PeerJ. 2023 Apr 13;11:e15032. doi: 10.7717/peerj.15032 (PMC10106083; doi:10.7717/peerj.15032)
Supplement: Data S1 [file peerj-11-15032-s001.xlsx]

## Sheet: Supplemental Table S1
Cadmium dose (mg/kg d. wt Cd)	Snail number	Pre-exposure weight (g)	Post-exposure weight (g)	Body weight gain /loss (g)
0	1	7.74	9.72	1.98
0	2	8.23	9.74	1.51
0	3	8.87	10.24	1.37
0	4	9.29	12.67	3.38
0	5	8.37	11.46	3.09
0	6	7.02	10.08	3.06
0	7	8.84	12.02	3.18
0	8	8.25	11.02	2.77
0.05	1	10.22	12.28	2.06
0.05	2	8.23	10.98	2.75
0.05	3	8.63	10.76	2.13
0.05	4	9.24	11.25	2.01
0.05	5	7.66	11.89	4.23
0.05	6	9.02	12.34	3.32
0.05	7	7.19	10.02	2.83
0.05	8	8.44	9.98	1.54
0.1	1	8.33	11.34	3.01
0.1	2	9.21	12.04	2.83
0.1	3	7.96	11.13	3.17
0.1	4	10.2	13.45	3.25
0.1	5	8.3	11.24	2.94
0.1	6	9.25	10.98	1.73
0.1	7	9.76	11.54	1.78
0.1	8	8.3	10.76	2.46
0.2	1	8.03	10.34	2.31
0.2	2	9.9	12.06	2.16
0.2	3	8.76	11.22	2.46
0.2	4	7.52	10.76	3.24
0.2	5	9.24	11.53	2.29
0.2	6	9.57	10.98	1.41
0.2	7	8.94	11.34	2.4
0.2	8	7.86	10.42	2.56
1	1	7.93	9.87	1.94
1	2	8.24	10.56	2.32
1	3	9.11	11.24	2.13
1	4	9.36	12.07	2.71
1	5	10.98	12.76	1.78
1	6	8.78	11.05	2.27
1	7	9.76	11.78	2.02
1	8	10.14	12.35	2.21
5	1	11.2	13.25	2.05
5	2	9.87	12.06	2.19
5	3	9.2	11.78	2.58
5	4	8.76	10.97	2.21
5	5	8.48	10.25	1.77
5	6	7.98	10.32	2.34
5	7	7.76	9.12	1.36
5	8	8.56	9.76	1.2
10	1	10.23	10.79	0.56
10	2	9.78	11.45	1.67
10	3	9.21	11.87	2.66
10	4	8.64	10.93	2.29
10	5	7.97	8.26	0.29
10	6	10.02	11.45	1.43
10	7	8.38	9.56	1.18
10	8	9.67	10.78	1.11
100	1	8.77	8.02	-0.75
100	2	7.98	7.3	-0.68
100	3	8.24	7.76	-0.48
100	4	9.76	8.98	-0.78
100	5	10.23	10.02	-0.21
100	6	9.45	9.67	0.22
100	7	8.76	8.98	0.22
100	8	9.8	8.76	-1.04

## Sheet: Supplemental Table S2
Cadmium dose (mg/kg d. wt Cd)	Snail number	Survival time (days)	Data type
100	1	15	complete
100	2	28	censored
100	3	28	censored
100	4	28	censored
100	5	28	censored
100	6	28	censored
100	7	28	censored
100	8	28	censored
100	9	28	censored
100	10	28	censored
100	11	28	censored
100	12	28	censored
100	13	23	complete
100	14	28	censored
100	15	28	censored
100	16	28	censored
100	17	28	censored
100	18	28	censored
100	19	28	censored
100	20	28	censored
10	1	28	censored
10	2	28	censored
10	3	28	censored
10	4	28	censored
10	5	28	censored
10	6	28	censored
10	7	28	censored
10	8	28	censored
10	9	25	complete
10	10	28	censored
10	11	28	censored
10	12	28	censored
10	13	28	censored
10	14	28	censored
10	15	28	censored
10	16	28	censored
10	17	28	censored
10	18	28	censored
10	19	28	censored
10	20	28	censored
5	1	28	censored
5	2	28	censored
5	3	28	censored
5	4	28	censored
5	5	28	censored
5	6	28	censored
5	7	28	censored
5	8	28	censored
5	9	28	censored
5	10	28	censored
5	11	28	censored
5	12	28	censored
5	13	28	censored
5	14	28	censored
5	15	28	censored
5	16	28	censored
5	17	28	censored
5	18	28	censored
5	19	28	censored
5	20	28	censored
1	1	28	censored
1	2	28	censored
1	3	28	censored
1	4	28	censored
1	5	28	censored
1	6	28	censored
1	7	28	censored
1	8	28	censored
1	9	28	censored
1	10	28	censored
1	11	28	censored
1	12	28	censored
1	13	28	censored
1	14	28	censored
1	15	28	censored
1	16	28	censored
1	17	28	censored
1	18	28	censored
1	19	28	censored
1	20	28	censored
0.2	1	28	censored
0.2	2	28	censored
0.2	3	28	censored
0.2	4	28	censored
0.2	5	28	censored
0.2	6	28	censored
0.2	7	28	censored
0.2	8	28	censored
0.2	9	28	censored
0.2	10	28	censored
0.2	11	28	censored
0.2	12	28	censored
0.2	13	28	censored
0.2	14	28	censored
0.2	15	28	censored
0.2	16	28	censored
0.2	17	28	censored
0.2	18	28	censored
0.2	19	28	censored
0.2	20	28	censored
0.1	1	28	censored
0.1	2	28	censored
0.1	3	28	censored
0.1	4	28	censored
0.1	5	28	censored
0.1	6	28	censored
0.1	7	28	censored
0.1	8	28	censored
0.1	9	28	censored
0.1	10	28	censored
0.1	11	28	censored
0.1	12	28	censored
0.1	13	28	censored
0.1	14	28	censored
0.1	15	28	censored
0.1	16	28	censored
0.1	17	28	censored
0.1	18	28	censored
0.1	19	28	censored
0.1	20	28	censored
0.05	1	28	censored
0.05	2	28	censored
0.05	3	28	censored
0.05	4	28	censored
0.05	5	28	censored
0.05	6	28	censored
0.05	7	28	censored
0.05	8	28	censored
0.05	9	28	censored
0.05	10	28	censored
0.05	11	28	censored
0.05	12	28	censored
0.05	13	28	censored
0.05	14	28	censored
0.05	15	28	censored
0.05	16	28	censored
0.05	17	28	censored
0.05	18	28	censored
0.05	19	28	censored
0.05	20	28	censored
0	1	28	censored
0	2	28	censored
0	3	28	censored
0	4	28	censored
0	5	28	censored
0	6	28	censored
0	7	28	censored
0	8	28	censored
0	9	28	censored
0	10	28	censored
0	11	28	censored
0	12	28	censored
0	13	28	censored
0	14	28	censored
0	15	28	censored
0	16	28	censored
0	17	28	censored
0	18	28	censored
0	19	28	censored
0	20	28	censored

## Sheet: Supplemental Table S3
	Cadmium dose (mg/kg d. wt Cd)	5mC% hepatopancreas	5mC% ovotestis
	0	0.232	1.138
	0	0.265	0.257
	0	0.42	0.434
	0	0.318	1.046
	0.05	0.23	0.813
	0.05	0.334	0.595
	0.05	0.428	0.437
	0.05	0.303	0.265
	0.1	0.198	0.191
	0.1	0.424	0.161
	0.1	0.253	0.198
	0.1	0.223	0.327
	0.2	0.183	1.016
	0.2	0.253	0.659
	0.2	0.476	0.435
	0.2	0.383	0.85
	1	0.234	0.124
	1	0.409	0.76
	1	0.167	0.647
	1	0.423	0.236
	5	0.445	0.574
	5	0.127	0.527
	5	0.343	1.112
	5	0.476	0.249
	10	0.353	0.149
	10	0.276	1.029
	10	0.254	0.71
	10	0.322	0.361
	100	0.765	1.539
	100	1.18	1.148
	100	0.829	0.26
	100	0.765	0.824
